# Supplementary material for: Sp1-Mediated circRNA circHipk2 Regulates Myogenesis by Targeting Ribosomal Protein Rpl7
Source: MDPI journal article supplement (doi:10.3390/genes12050696), 2021-05-08
Supplement: s1 [file s1]

## Figure supplement 1-3

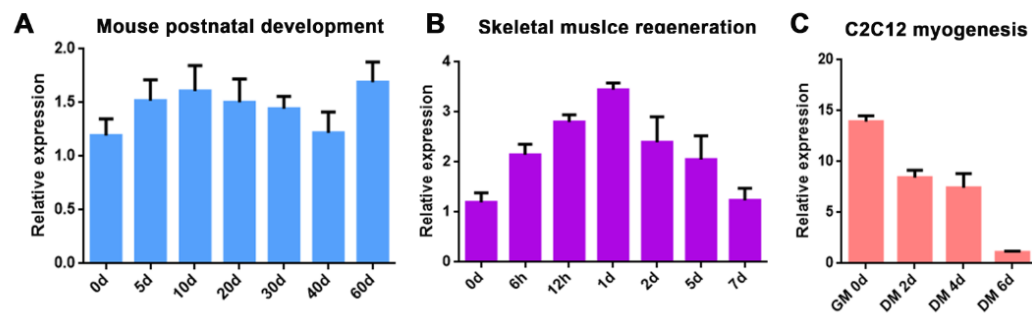

**Figure S1. The temporal expression patterns of Hipk2.** The expression of Hipk2 (A) during postnatal development in the hind leg muscles of C57BL/6 mice, (B) during CTX-induced TA muscle regeneration and (C) in C2C12 myogenesis.

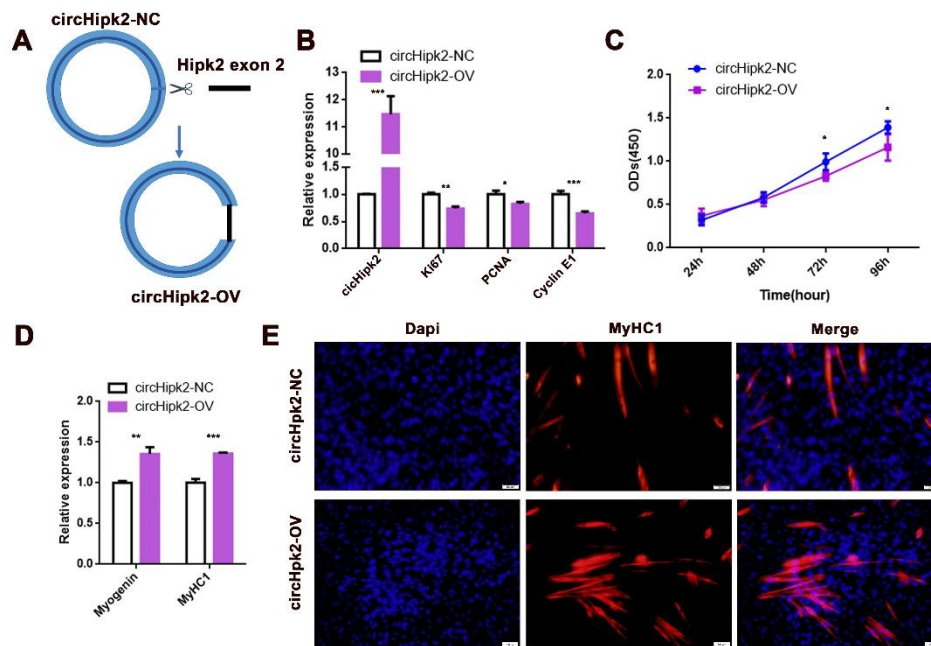

**Figure S2. Overexpression of circHipk2 prevents C2C12 myoblasts proliferation but promotes differentiation.** (A) Schematic diagram of the efficiency of circHipk2 overexpression vector construction. (B) The expression of proliferation and cell cycle markers was quantitated by RT-qPCR in C2C12 myoblasts after transfection with circHipk2-OV or circHipk2-NC. (C) Cell proliferation was assessed using the CCK-8 assay after transfection with circHipk2-OV or circHipk2-NC. (D) The expression of myogenic differentiation markers was quantitated by RT-qPCR in C2C12 myoblasts after transfection with circHipk2-OV or circHipk2-NC. Data are presented as the mean  $\pm$  S.D. N=3 per group. \* P < 0.05 and \*\* P < 0.01. (E) Immunofluorescence analysis of MyHC1 cells (red) after transfection with circHipk2-OV or circHipk2-NC in C2C12 myoblasts.; the scale bars represent 100  $\mu$ m.

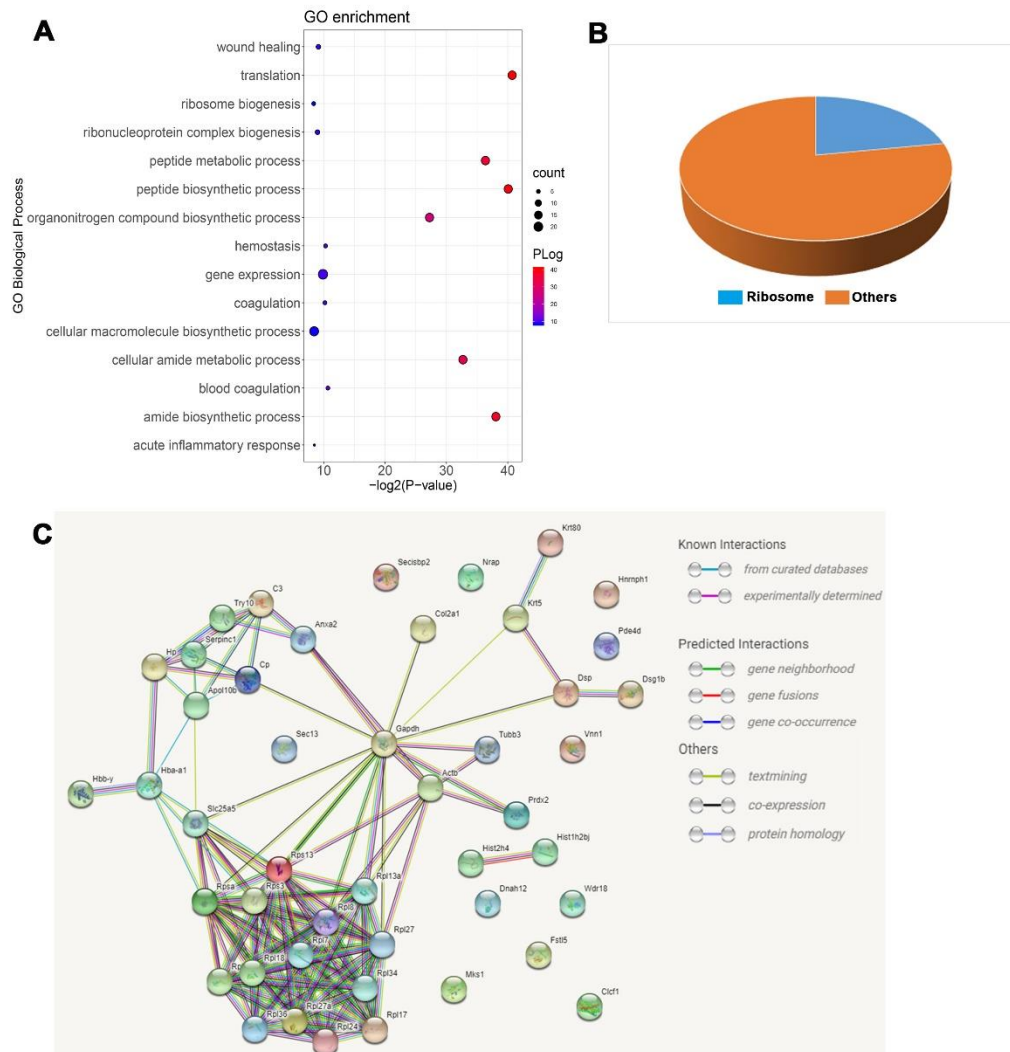

**Figure S3. Identification of circHippk2 binding proteins.** (A) GO analyses of circHippk2 pull down proteins. (B) Summary of circHippk2 binding proteins according to KEGG pathway analysis and published functions. (C) The interaction between circHippk2 binding proteins.
